# Supplementary material for: Study of mixed matrix membranes with in situ synthesized zeolite imidazolate frameworks (ZIF-8, ZIF-67) in polyethersulfone polymer for CO2/CH4 separation
Source: Royal Society of Chemistry journal article supplement (doi:10.1039/d4ra04400b), 2024-01-01
Supplement: d4ra04400b1.pdf [file d4ra04400b1.pdf]

## Electronic Supporting Information

**Study of mixed matrix membranes with in-situ synthesized zeolite imidazolate frameworks (ZIF-8, ZIF-67) in polyethersulfone polymer for CO<sub>2</sub>/CH<sub>4</sub> separation**

**Aditya Jonnalagedda, Bhanu Vardhan Reddy Kuncharam \***

Department of Chemical Engineering,  
Birla Institute of Technology & Science, Pilani, Pilani Campus  
Rajasthan, 333031, India

\*Corresponding author:

Dr. Bhanu Vardhan Reddy Kuncharam,  
Associate Professor, Department of Chemical Engineering,  
Birla Institute of Technology and Science, Pilani, Pilani, Rajasthan, India  
Phone: +91-1596255839  
Email: [bhanu.vardhan@pilani.bits-pilani.ac.in](mailto:bhanu.vardhan@pilani.bits-pilani.ac.in)

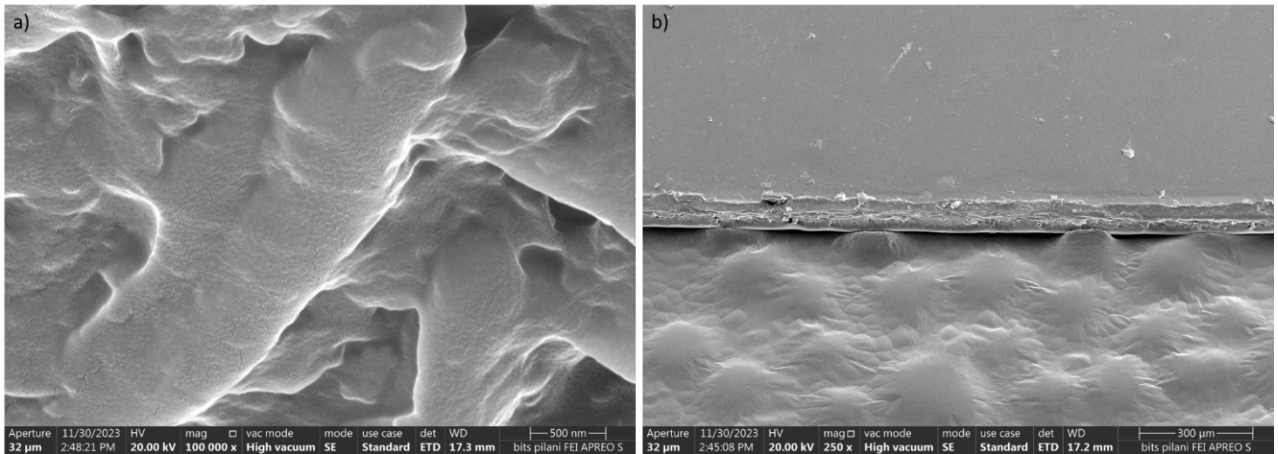

**Fig S1. (a, b)** Cross-section FESEM images of pure polyether sulfone (PES) membrane

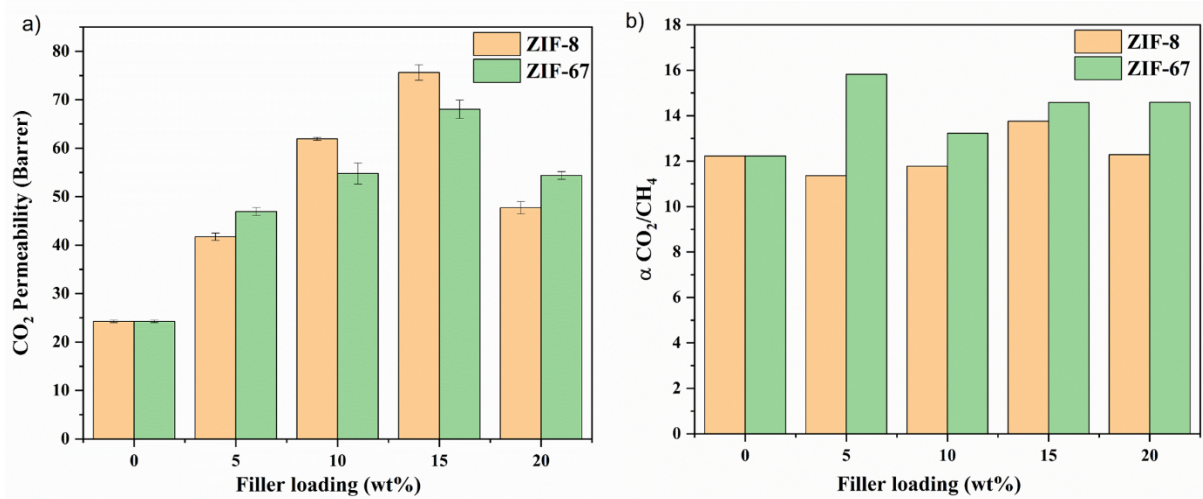

**Fig. S2** Comparison plot of a) CO<sub>2</sub> permeability and b) CO<sub>2</sub>/CH<sub>4</sub> Selectivity for ZIF-8/PES and ZIF-67/PES MMMs at 0.5 bar

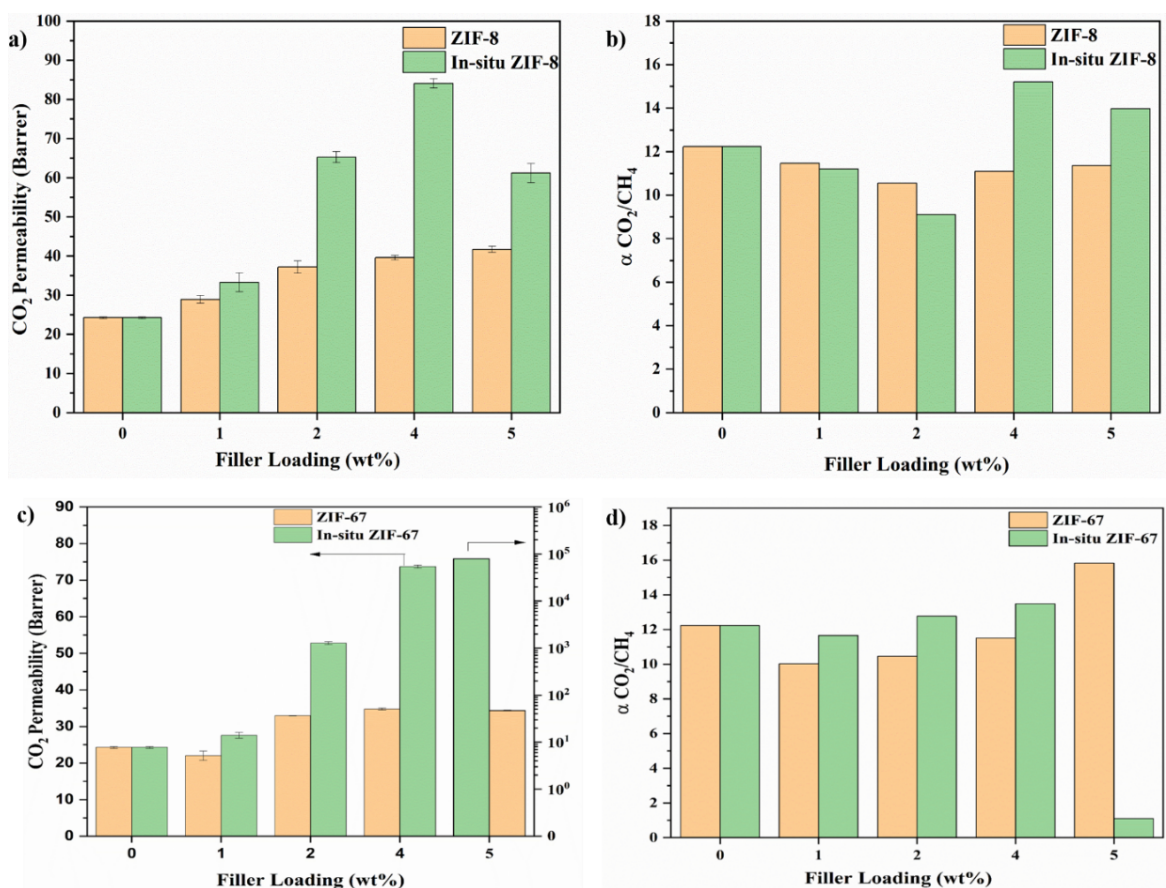

**Fig. S3** Comparison plot of (a, c) CO<sub>2</sub> permeability and (b, d) CO<sub>2</sub>/CH<sub>4</sub> Selectivity for in-situ and non-in-situ MMMs at 0.5 bar

### Effect of unreacted species (metal ions and linkers)

We have used gas permeation data of in-situ membranes to study the effect of unreacted metal ions ( $Zn^{+2}/Co^{+2}$ ) and imidazole linkers. In Fig.S3, we can see the CO<sub>2</sub> permeability of in-situ ZIF-8 membranes is increased until 4 wt.% ZIF-8 and decreased at 5 wt.% ZIF-8, this decrease is possibly associated with unreacted  $Zn^{+2}$  ions hindering the CO<sub>2</sub> passage through the membrane,<sup>1</sup> the unreacted  $Zn^{+2}$  ions in PES polymer functioned as a gas barrier without causing any significant structural defects<sup>2</sup> and also some literature studies show significant decrease in CO<sub>2</sub> permeability at high  $Zn^{+2}$  ions concentration.<sup>3,4</sup> The presence of unreacted 2-methyl imidazole linkers should enhance CO<sub>2</sub>/CH<sub>4</sub> selectivity exponentially,<sup>1</sup> but when we observe the in-situ MMMs selectivity it has decreased for 2 wt.% in-situ ZIF-8, 5 wt.% ZIF-8 and 5 wt.% in-situ MMMs despite the increase of CO<sub>2</sub> permeability in some cases. The CO<sub>2</sub> permeability of in-situ ZIF-67 MMMs has not dropped, this might indicate the low presence of  $Co^{+2}$  ions in PES polymer chains (possibility of higher conversion of ZIF-67). A detailed

experimental investigations need to be conducted in future studies to get the full idea of this phenomenon.

#### References

- 1 M. S. Maleh and A. Raisi, *Colloids Surfaces A Physicochem. Eng. Asp.*, 2023, **659**, 130747.
- 2 C. S. Lee, N. U. Kim, B. J. Park and J. H. Kim, *Sep. Purif. Technol.*, 2020, **253**, 117514.
- 3 D. Peng, S. Wang, Z. Tian, X. Wu, Y. Wu, H. Wu, Q. Xin, J. Chen, X. Cao and Z. Jiang, *J. Memb. Sci.*, 2017, **522**, 351–362.
- 4 T. Hou, L. Shu, K. Guo, X.-F. Zhang, S. Zhou, M. He and J. Yao, *Cellulose*, 2020, **27**, 3277–3286.
